# Supplementary material for: Enhanced detection sensitivity of the chemisorption of pyridine and biotinylated proteins at localized surface plasmon resonance inflection points in single gold nanorods
Source: Royal Society of Chemistry journal article supplement (doi:10.1039/d1an00489a), 2021-01-01
Supplement: d1an00489a1.pdf [file d1an00489a1.pdf]

## **Electronic Supplementary Information**

### **Enhanced Detection Sensitivity on Chemisorption of Pyridine and Biotinylated Proteins at Localized Surface Plasmon Resonance Inflection Points in Single Gold Nanorods**

Kyeong Rim Ryu<sup>a</sup> and Ji Won Ha<sup>a,b\*</sup>

<sup>a</sup>Advanced Nano-Bio-Imaging and Spectroscopy Laboratory, Department of Chemistry, University of Ulsan, 93 Daehak-ro, Nam-gu, Ulsan 44610, Republic of Korea

<sup>b</sup>Energy Harvest-Storage Research Center (EHSRC), University of Ulsan, 93 Daehak-ro, Nam-gu, Ulsan 44610, Republic of Korea

\*To whom correspondence should be addressed.

**J. W. Ha**

Phone: +82-52-712-8012

Fax: +82-52-712-8002

E-mail: [jwha77@ulsan.ac.kr](mailto:jwha77@ulsan.ac.kr)

This document contains supplementary figures (Figures S1 to S9).

## Supplementary Figures

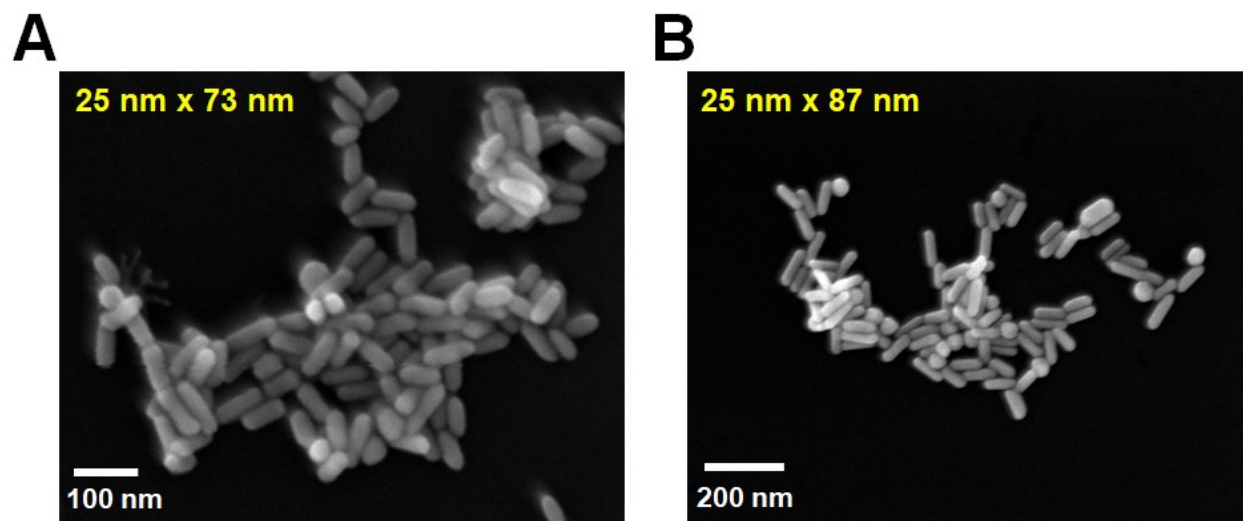

**Fig. S1 (A)** SEM image of AuNRs with an AR of 2.97 (25 nm  $\times$  73 nm). **(B)** SEM image of AuNRs with an AR of 3.48 (25 nm  $\times$  87 nm).

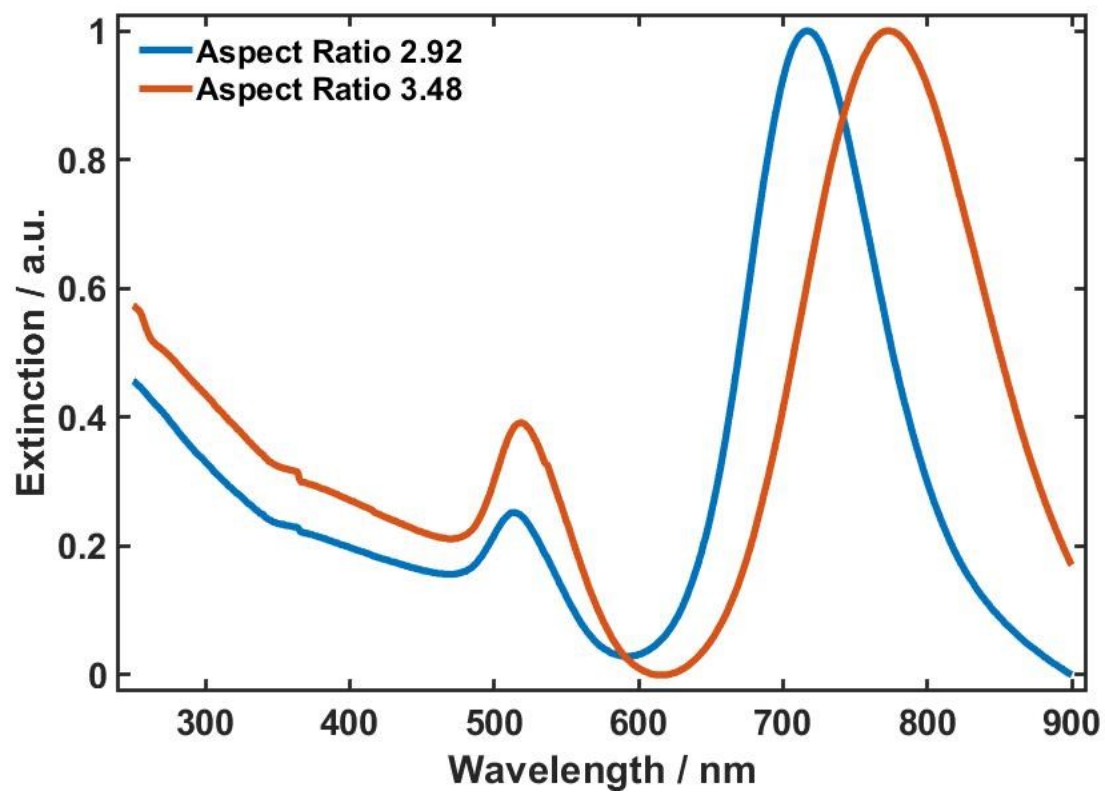

**Fig. S2** Overlaid UV-Vis extinction spectra of AuNRs with two different ARs dispersed in water.

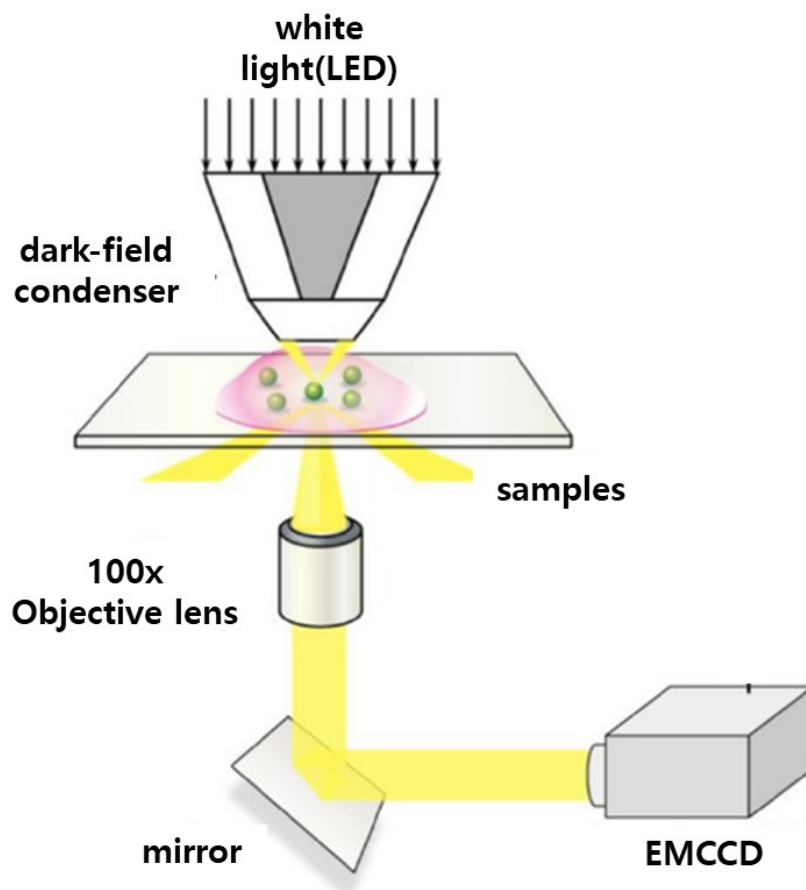

**Fig. S3** Schematic to show the working principle of scattering-based DF microscopy and spectroscopy

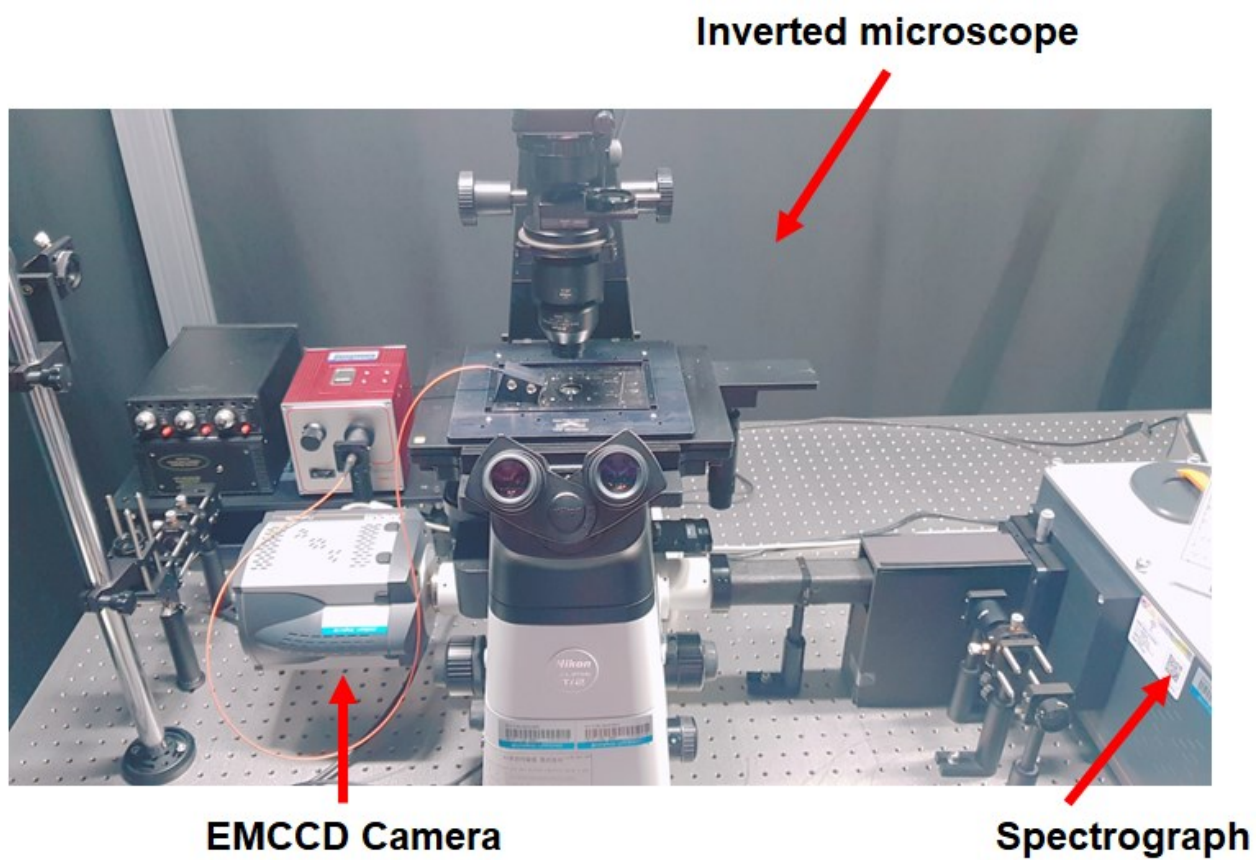

**Fig. S4** A photograph to show the experimental setup for single-particle DF microscopy and spectroscopy.

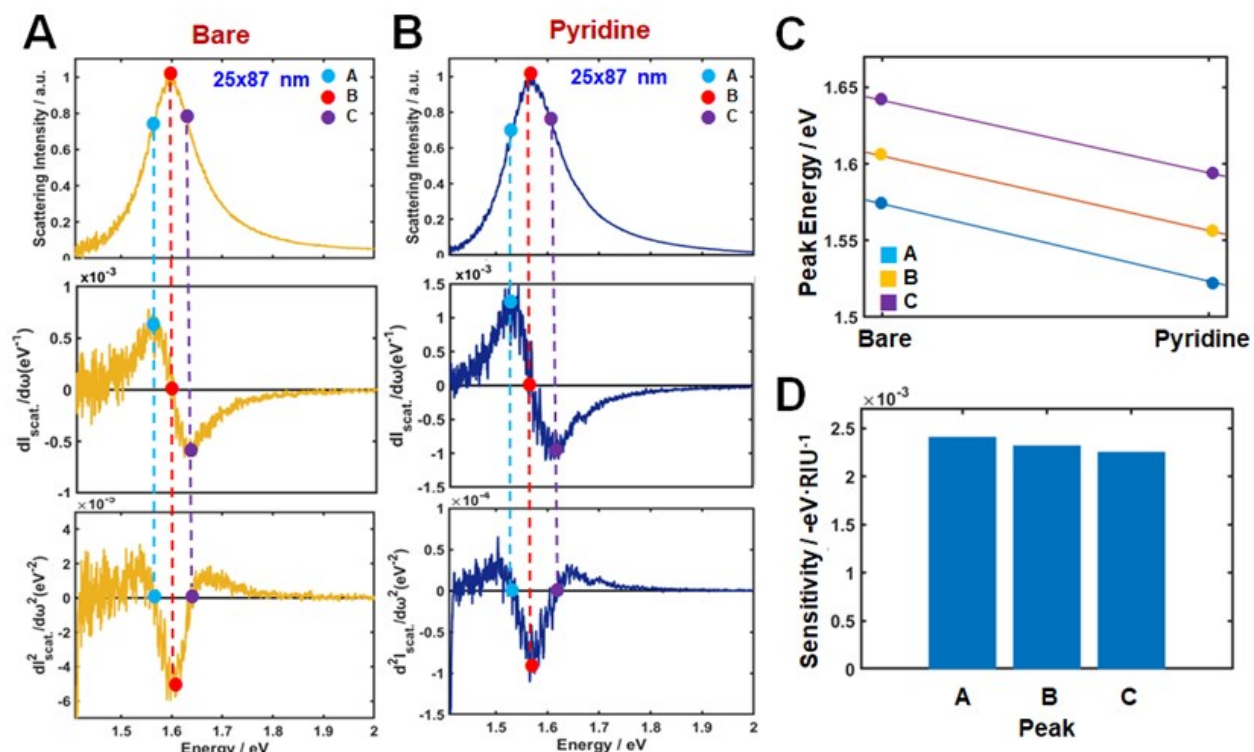

**Fig. S5** Inflection point method for single-particle LSPR scattering sensing with AuNRs (25 nm  $\times$  87 nm, AR = 3.48) in the presence of the pyridine in water. **(A, B)** LSPR scattering efficiencies (first row), and its first (second row), and second (third row) order derivatives. **(C)** Peak energy plotted against the chemical adsorption of pyridine for points A, B, and C. **(D)** Detection sensitivity on peak shifts A, B and C.

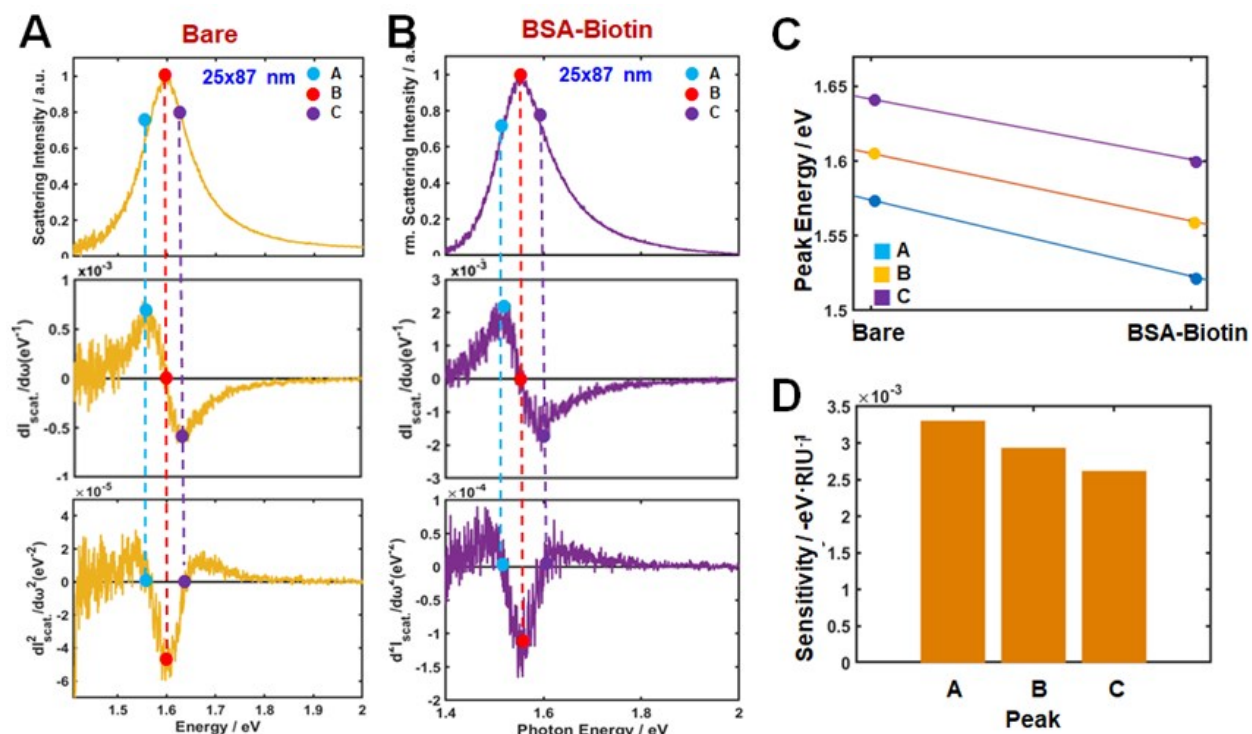

**Fig. S6** Inflection point method for single-particle LSPR scattering sensing with AuNRs (25 nm  $\times$  87 nm, AR = 3.48) in the presence of the biotinylated BSA proteins (BSA-biotin) in water. **(A, B)** LSPR scattering efficiencies (first row), and its first (second row), and second (third row) order derivatives. **(C)** Peak energy plotted against the chemical adsorption of BSA-biotin for points A, B, and C. **(D)** Detection sensitivity on peak shifts A, B and C.

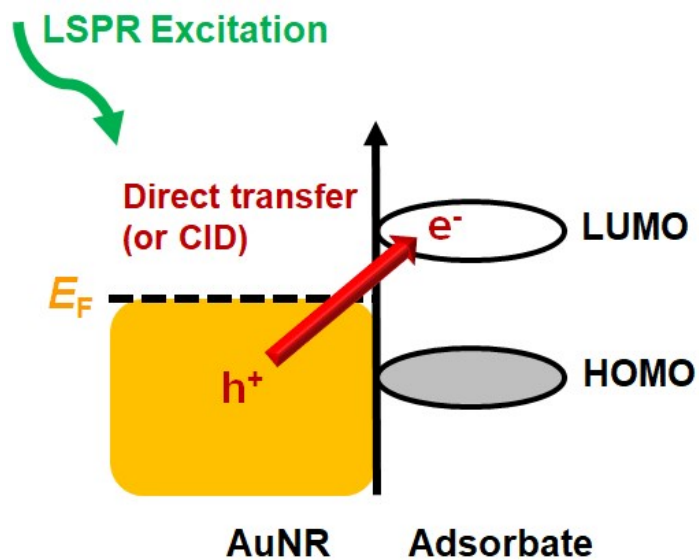

**Fig. S7** Schematic depicting the direct interfacial hot-electron transfer (or chemical interface damping) from gold to the LUMO of adsorbate.



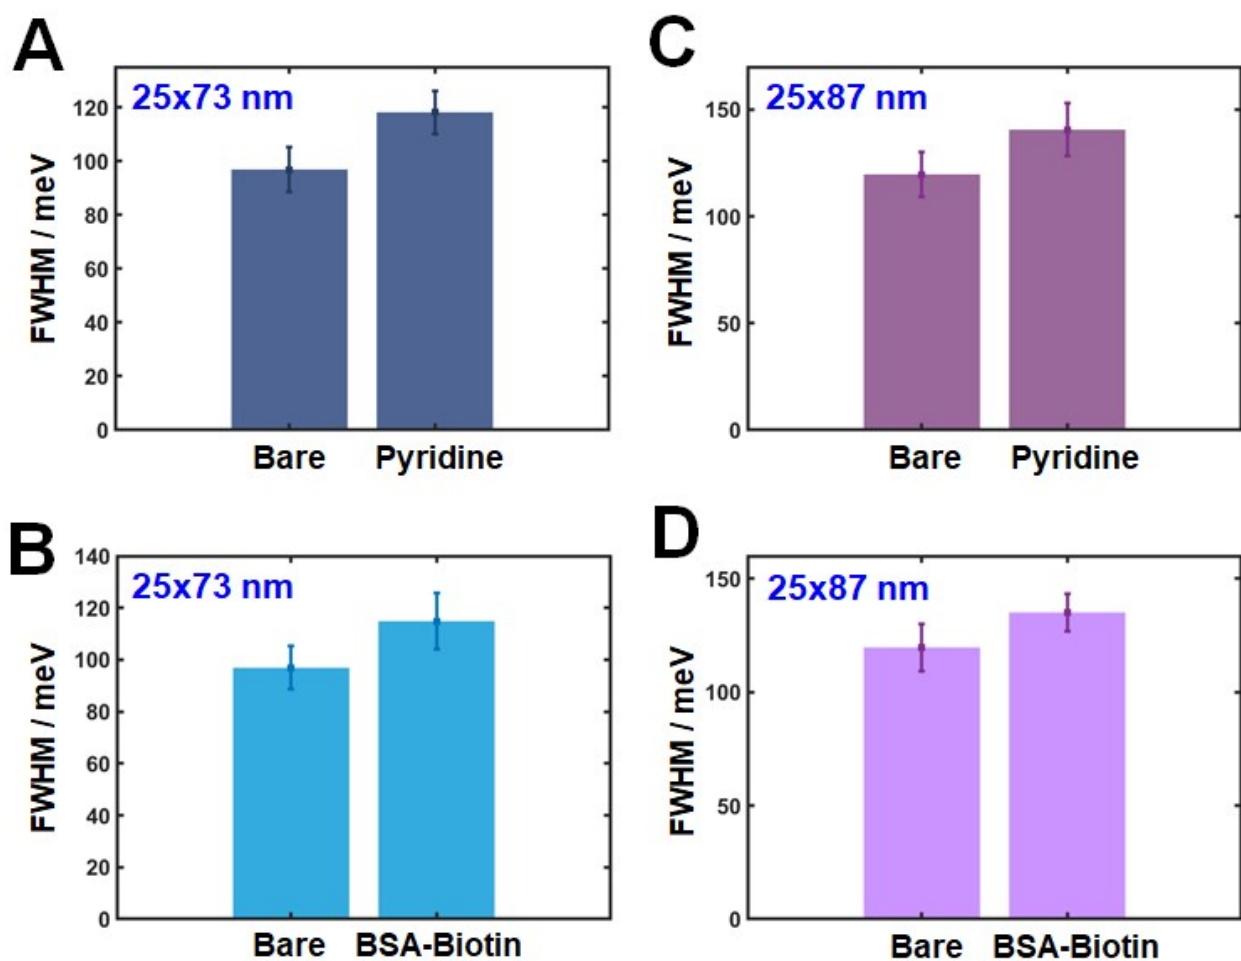

**Fig. S8** (A) The LSPR linewidth broadening (or the increase in FWHM) caused by the adsorption of pyridine on the AuNR surface (25 nm × 73 nm). (B) The LSPR linewidth broadening caused by the adsorption of BSA-biotin on the AuNR surface (25 nm × 73 nm). (C) The LSPR linewidth broadening caused by the adsorption of pyridine on the AuNR surface (25 nm × 87 nm). (D) The LSPR linewidth broadening caused by the adsorption of BSA-biotin on the AuNR surface (25 nm × 87 nm).

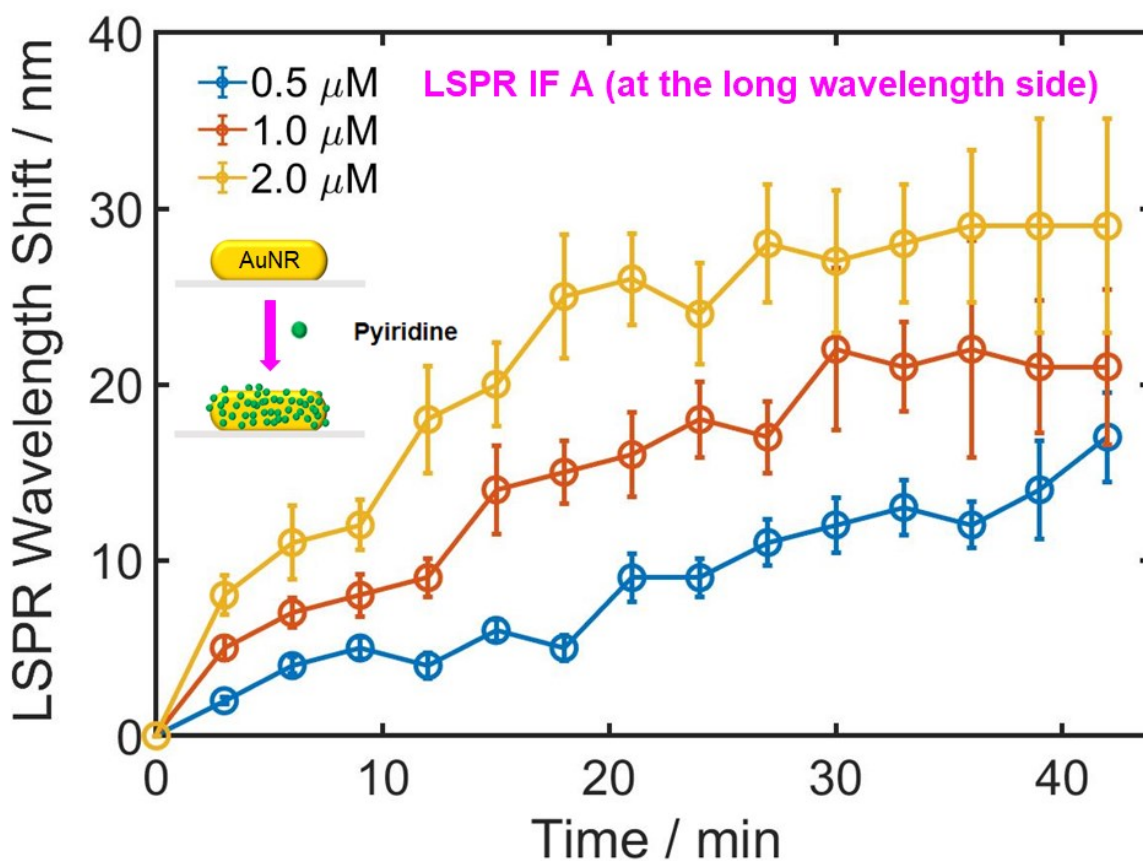

**Fig. S9** Effect of the pyridine concentration on the LSPR wavelength shift at the LSPR IF A (longer wavelength side) of single AuNRs (25 nm  $\times$  73 nm) in real-time pyridine binding experiments. Scattering spectra of the AuNRs deposited on a glass substrate were obtained as a function of time after adding pyridine with different concentration of 0.5  $\mu\text{M}$  (blue), 1  $\mu\text{M}$  (red), and 2  $\mu\text{M}$  (yellow) in water.
